# Supplementary material for: Phase interface engineering of defect-rich 1T/2H-WX 2 /RGO (X = S, Se) nanosheets for efficient microwave absorption and supercapacitor applications
Source: Royal Society of Chemistry journal article supplement (doi:10.1039/d5ta09645f), 2026-01-01
Supplement: d5ta09645f1.pdf [file d5ta09645f1.pdf]

## **Supplementary Material**

### **Phase Interface Engineering of Rich-Defects 1T/2H-WX<sub>2</sub>/RGO (X=S, Se) Nanosheets for Efficient Microwave Absorber and Supercapacitor Applications**

Tengfei Wang <sup>a</sup>, Qing Pang <sup>a</sup>, Boyu Liu <sup>a</sup>, Kaimin Fan <sup>b,\*</sup>, Hongyu Wang <sup>a,\*</sup>

<sup>a</sup> Qinghai Provincial Key Laboratory of New Light Alloys, Qinghai Provincial  
Engineering Research Center of High-Performance Light Metal Alloys and Forming,  
Qinghai University, Xining 810016, PR China

<sup>b</sup> Center for General Education, Qinghai Institute of Technology, Xining, 810016  
China

---

\*Corresponding authors.

E-mail addresses: fankm128@163.com (K. Fan), wanghongyu07010310@163.com (H. Wang).

The relationship  $\varepsilon'$  and  $\varepsilon''$  can be expressed as formula S1 and S2 for further analyzed to clarify the dielectric loss mechanism:

$$(\varepsilon' - \varepsilon_\infty)^2 + (\varepsilon'')^2 = (\varepsilon_s - \varepsilon_\infty)^2 \quad (S1)$$

$$\varepsilon'' = \varepsilon_p'' + \varepsilon_c'' = \frac{\varepsilon_s - \varepsilon_\infty}{1 + \omega^2 \tau^2} \omega \tau + \frac{\sigma}{\omega \varepsilon_0} \quad (S2)$$

Among them,  $\varepsilon_s$  is the relative dielectric constant at static state,  $\varepsilon_\infty$  is the relative dielectric constant at high frequency,  $\varepsilon_0$  is the vacuum dielectric constant,  $\omega$  is the angular frequency,  $\tau$  is the relaxation time, and  $\sigma$  is the conductivity. Among,  $\varepsilon''$  can be divided into the conduction loss ( $\varepsilon_c''$ ) and polarization relaxation loss ( $\varepsilon_p''$ ), respectively.

The reflection loss (RL) is calculated by transmission line theory according to formula (S3) and formula (S4):

$$RL(dB) = 20 \lg \left| \frac{Z_{in} - Z_0}{Z_{in} + Z_0} \right|$$

(S3)

$$Z_{in} = Z_0 \sqrt{\frac{\mu_r}{\varepsilon_r} \tanh(j \frac{2\pi f d}{c} \sqrt{\mu_r \varepsilon_r d})}$$

(S4)

In the formula,  $Z_0$  represents the free space impedance,  $Z_{in}$  denotes the input characteristic impedance,  $f$  is the microwave frequency,  $d$  refers to the thickness of absorber and  $c$  is the speed of light. When  $RL < -10$  dB, it means that more than 90 % of the electromagnetic waves are absorbed by the absorber.

The quarter-wavelength matching theory can be described as formula S5:

$$t_m = \frac{n\lambda}{4} = \frac{nc}{4f_m(|\varepsilon_r||\mu_r|)} (n = 1, 3, 5 \dots)$$

(S5)

In the above formula,  $t_m$  represents the matching thickness when reaching  $RL_{\min}$ , and  $f_m$  represents the corresponding frequency.

The attenuation constants ( $\alpha$ ) and impedance matching ( $Z$ ) can be calculated by formulas (S6) and (S7):

$$\alpha = \frac{\sqrt{2}\pi f}{c} \times \sqrt{(\mu''\varepsilon'' - \mu'\varepsilon')^2 + (\mu''\varepsilon'' + \mu'\varepsilon')^2 + (\mu'\varepsilon'' + \mu''\varepsilon')^2}$$

(S6)

$$Z = \frac{Z_{in}}{Z_0} = \frac{\sqrt{(\mu''^2 + \mu'^2)}}{\sqrt{(\varepsilon''^2 + \varepsilon'^2)}}$$

(S7)

The specific capacitance ( $C_m$ ) was calculated from the GCD results using the following formula S8:

$$C_m = (I\Delta t)/(m\Delta V)$$

(

S

8)

Among them,  $I$  and  $\Delta t$  represent the test current (A) and discharge time (s),  $m$  and  $\Delta V$  represent the mass of active material (g) and voltage window (V), respectively.

The capacitance control and diffusion control ratios can be quantitatively calculated by the following formula (S9):

$$i(v) = k_1 v + k_2 \quad (S9)$$

Where  $i$ ,  $v$ ,  $k_1$ , and  $k_2$ , represent the output current, scan rate, and two constants, respectively.

Energy density ( $E$ , Wh/kg) and power density ( $P$ , W/kg) were calculated by formulas (S10) and (S11):

$$E = \frac{C\Delta V}{7.2}$$

(S10)

$$p = 3600 \frac{E}{\Delta t} \quad (\text{S11})$$

where  $C$  is specific capacitance (F/g),  $\Delta V$  is the operating potential window (V) and  $\Delta t$  is discharge time (s).

**Table S1.** The microwave absorption properties of TMDs-based absorbing materials reported in the literature were compared.

| Samples                                                                                             | Thickness<br>(mm) | RL <sub>min</sub><br>(dB) | EAB<br>(GHz) | Filler Loading<br>(wt%) | References |
|-----------------------------------------------------------------------------------------------------|-------------------|---------------------------|--------------|-------------------------|------------|
| 1T/2H-WS <sub>2</sub> /RGO-15                                                                       | 2.60              | -45.69                    | 7.68         | 5                       | This work  |
| 1T/2H-WSe <sub>2</sub> /RGO-4                                                                       | 2.60              | -35.26                    | 7.04         | 5                       | This work  |
| MoSe <sub>2</sub> @rGO hybrids                                                                      | 2.32              | -68.70                    | 5.04         | 60                      | [1]        |
| MoSe <sub>2</sub> @RGO                                                                              | 7.56              | -22.8                     | 3.86         | 40                      | [2]        |
| 1T@2H-MoS <sub>2</sub> /RGO                                                                         | 2.50              | -66.77                    | 4.00         | 30                      | [3]        |
| RGO/MoSe <sub>2</sub> VDWH                                                                          | 6.29              | -65.34                    | 4.20         | 30                      | [4]        |
| Carbon nanofibers/MoSe <sub>2</sub>                                                                 | 3.06              | -53.33                    | 4.04         | 20                      | [5]        |
| Fe <sub>3</sub> O <sub>4</sub> /MoS <sub>2</sub> /rGO/Ti <sub>3</sub> C <sub>2</sub> T <sub>x</sub> | 3.61              | -66.92                    | 6.08         | 5                       | [6]        |
| WS <sub>2</sub> -rGO                                                                                | 2.70              | -41.5                     | 3.50         | 40                      | [7]        |

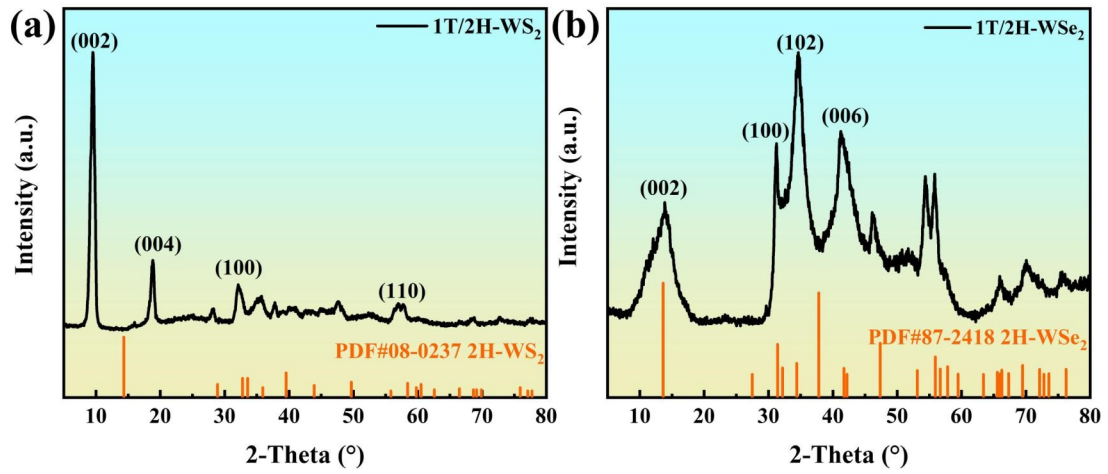

Fig. S1. (a, b) XRD spectrum of 1T/2H-WS<sub>2</sub> and 1T/2H-WSe<sub>2</sub>.

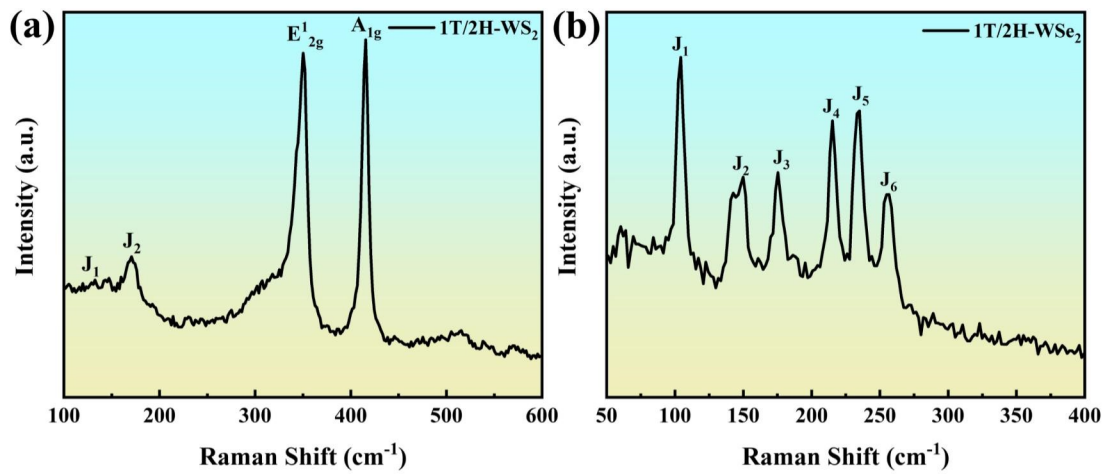

Fig. S2. (a, b) Raman images of 1T/2H-WS<sub>2</sub> and 1T/2H-WSe<sub>2</sub>.

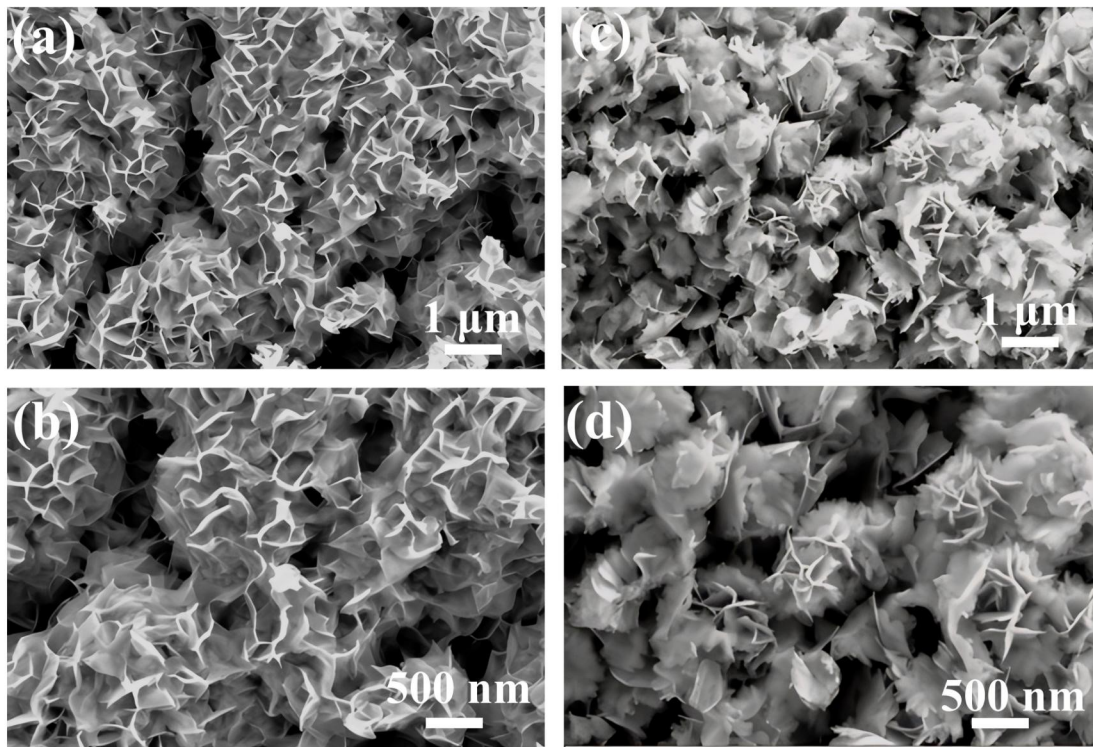

**Fig. S3.** SEM images of (a, b) 1T/2H-WS<sub>2</sub> and (c, d) 1T/2H-WSe<sub>2</sub>.

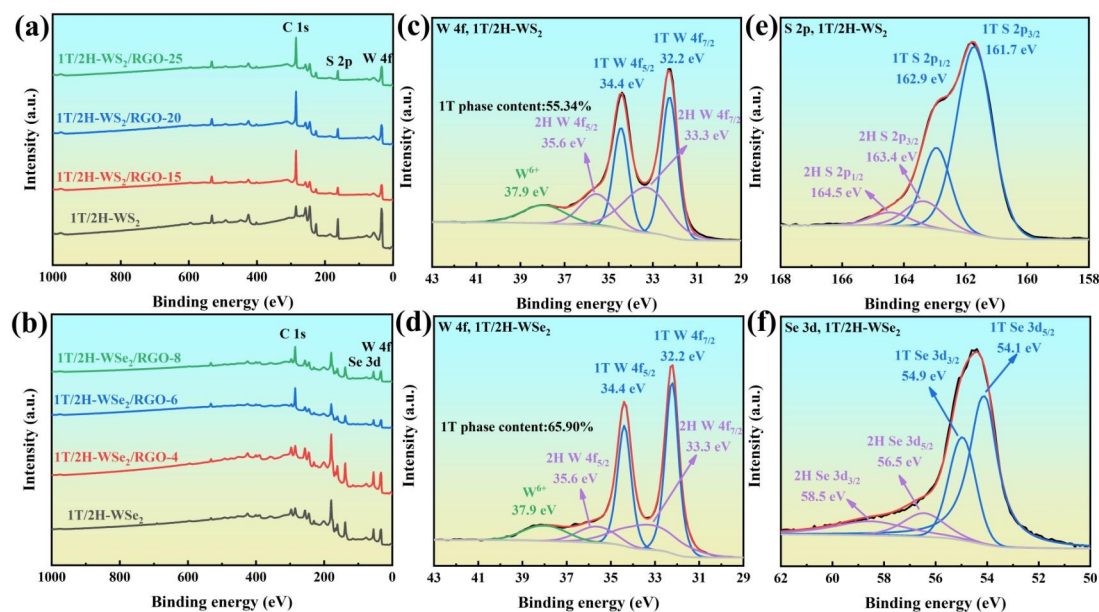

**Fig. S4.** The XPS survey spectra of (a) 1T/2H-WS<sub>2</sub>/RGO and (b) 1T/2H-WSe<sub>2</sub>/RGO, the high-resolution XPS of W 4f in (c) 1T/2H-WS<sub>2</sub> and (d) 1T/2H-WSe<sub>2</sub>, the high-resolution XPS of (e) S 2p in 1T/2H-WS<sub>2</sub> and (f) Se 3d in 1T/2H-WSe<sub>2</sub>.

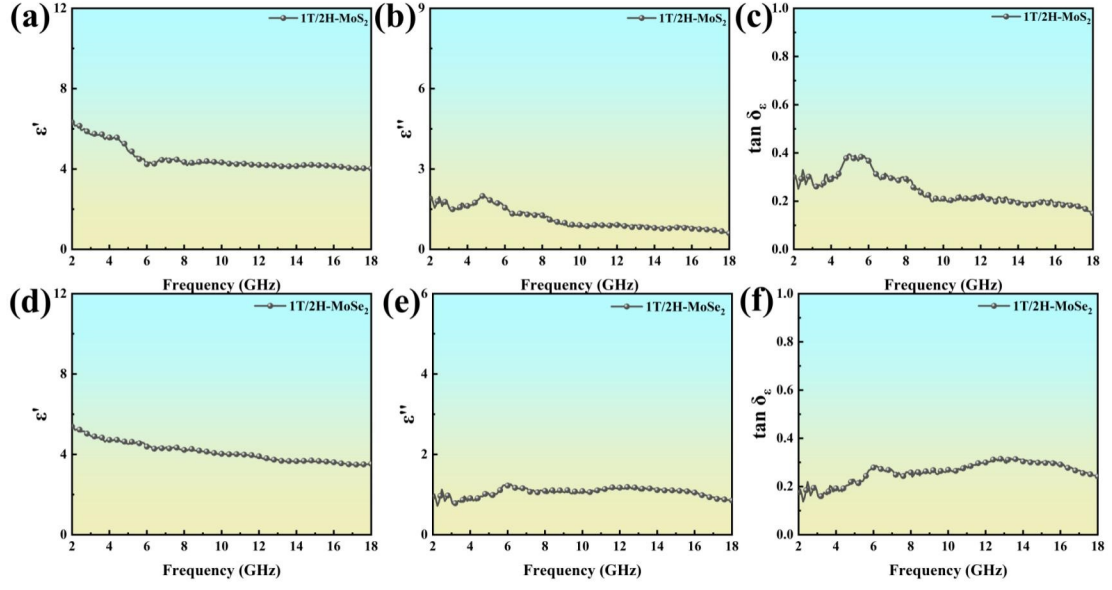

Fig. S5. Dielectric parameters of 1T/2H-WS<sub>2</sub> and 1T/2H-WSe<sub>2</sub> in the frequency range of 2-18 GHz: (a, d)  $\epsilon'$ , (b, e)  $\epsilon''$ , and (c, f)  $\tan \delta_\epsilon$ .

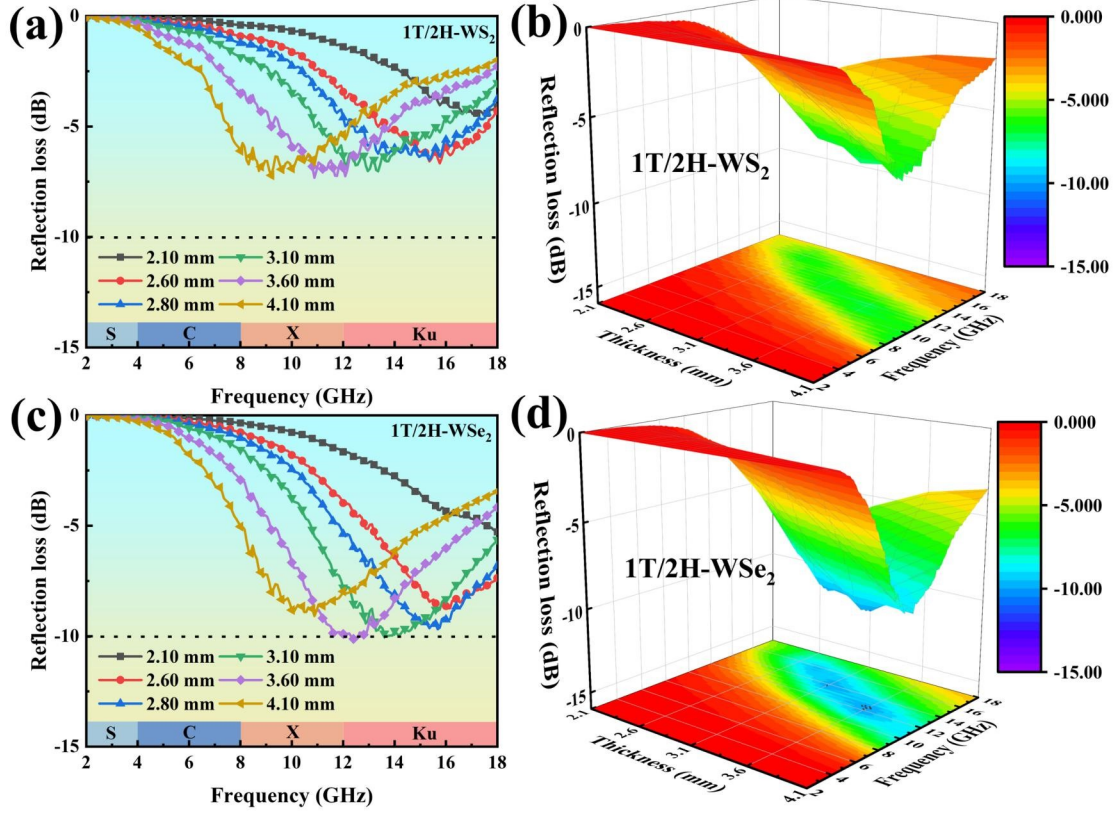

Fig. S6. The electromagnetic wave absorption properties of 2D and 3D RL curves plots of (a, b) 1T/2H-WS<sub>2</sub> and (c, d) 1T/2H-WSe<sub>2</sub>.



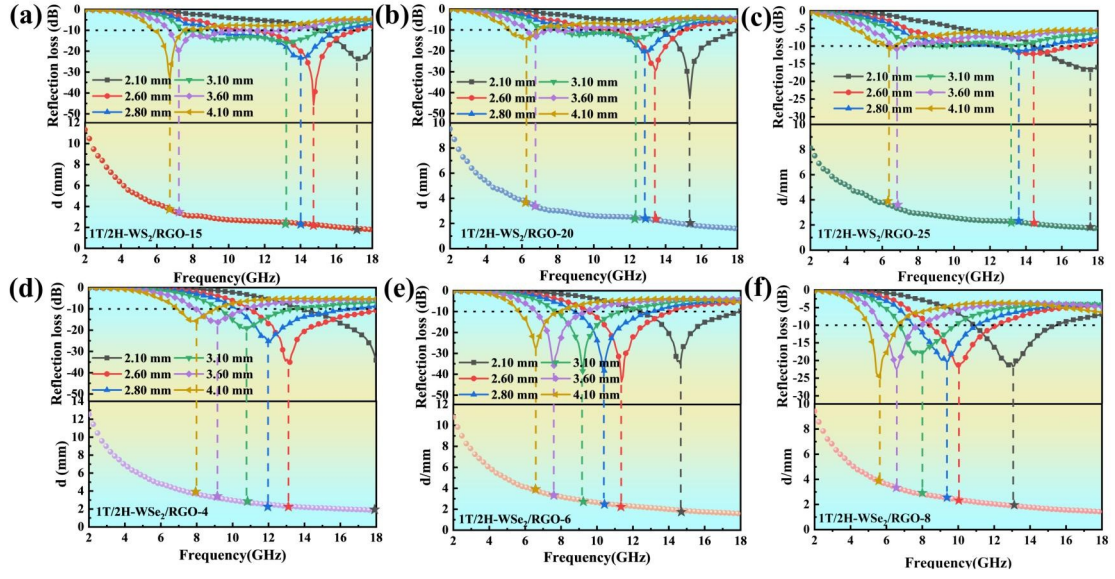

**Fig. S7.** The  $RL_{\min}$  value and the quarter-wavelength matching of (a-c) 1T/2H-WS<sub>2</sub>/RGO and (d-f) 1T/2H-WSe<sub>2</sub>/RGO.

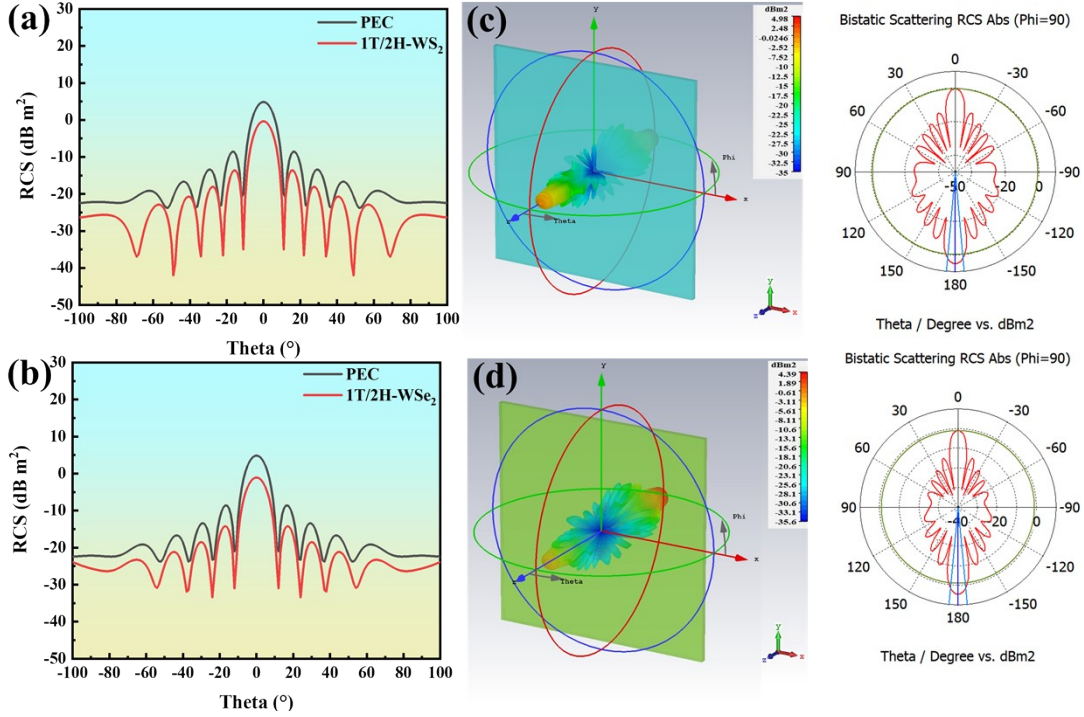

**Fig. S8.** (a, b) RCS reduction values of PEC and 1T/2H-WX<sub>2</sub> at different angles, (c, d) 3D and 1D RCS distribution for the PEC substrates covered with 1T/2H-WX<sub>2</sub>.



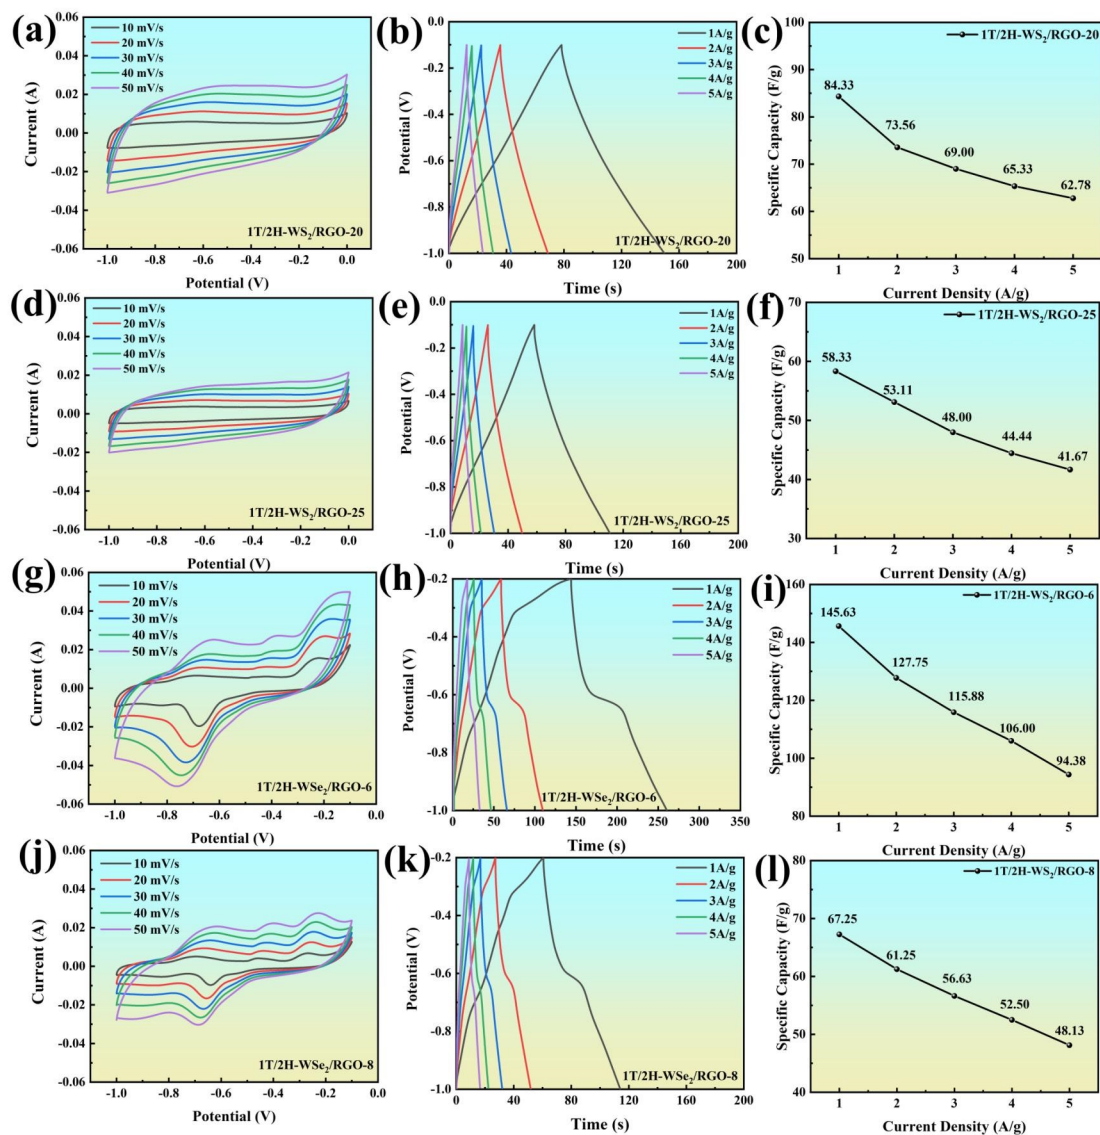

**Fig. S9.** CV curves, GCD curves, and specific capacitance at different current densities calculated from GCD test of (a-c) 1T/2H-WS<sub>2</sub>/RGO-20, (d-f) 1T/2H-WS<sub>2</sub>/RGO-25, (g-i) 1T/2H-WSe<sub>2</sub>/RGO-6, and (j-l) 1T/2H-WSe<sub>2</sub>/RGO-8.

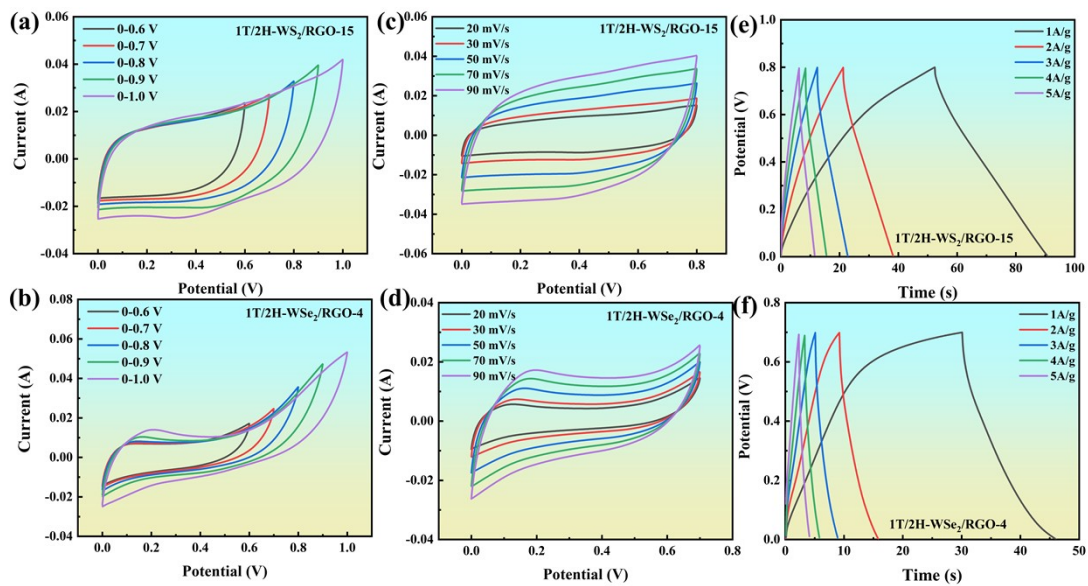

**Fig. S10.** (a, b) Voltage windows, (c, d) CV curves, and (e, f) GCD curves of assembled symmetrical supercapacitors of 1T/2H-WS<sub>2</sub>/RGO-15 and 1T/2H-WS<sub>2</sub>/RGO-4.

## References

1. W.-Q. Cao, Q. Zheng, L. Li, C.-B. Cao and M.-S. Cao, *J. Adv. Ceram.* **2024**, *13*, 1461-1472.
2. X.-Y. Fu, Q. Zheng, L. Li and M.-S. Cao, *Carbon* **2022**, *197*, 324-333.
3. H. Guo, L. Wang, W. You, L. Yang, X. Li, G. Chen, Z. Wu, X. Qian, M. Wang and R. Che, *ACS Appl. Mater. Interfaces* **2020**, *12*, 16831-16840.
4. L. Xiang, A. K. Darboe, Z. Luo, X. Qi, J.-j. Shao, X.-J. Ye, C.-S. Liu, K. Sun, Y. Qu and J. Xu, *Adv. Compos. Hybrid Mater.*, **2023**, *6*, 215.
5. Z. Xu, M. He, Y. Zhou, S. Nie, Y. Wang, Y. Huo, Y. Kang, R. Wang, R. Xu and H. Peng, *Nano Res.* **2021**, *14*, 738-746.
6. S. Yan, S. Shao, Y. Tang, X. Zhang, C. Guo, L. Wang, J. Liu, L. Wu and F. Wang, *ACS Appl. Mater. Interfaces* **2024**, *16*, 36962-36972.
7. D. Zhang, T. Liu, J. Cheng, Q. Cao, G. Zheng, S. Liang, H. Wang and M.-S. Cao, *Nano-Micro Lett.* **2019**, *11*, 38.
8. Y. Zhang, L. Zhang, B. Zhou, H. Cheng, Q. Zhang and B. Zhang, *Carbon* **2023**, *205*, 562-572.
